# Supplementary material
Source: publisher site journal article supplement (https://www.dovepress.com/article/416084)
Supplement: Supplementary file 1 [file get_supplementary_file.php]

**
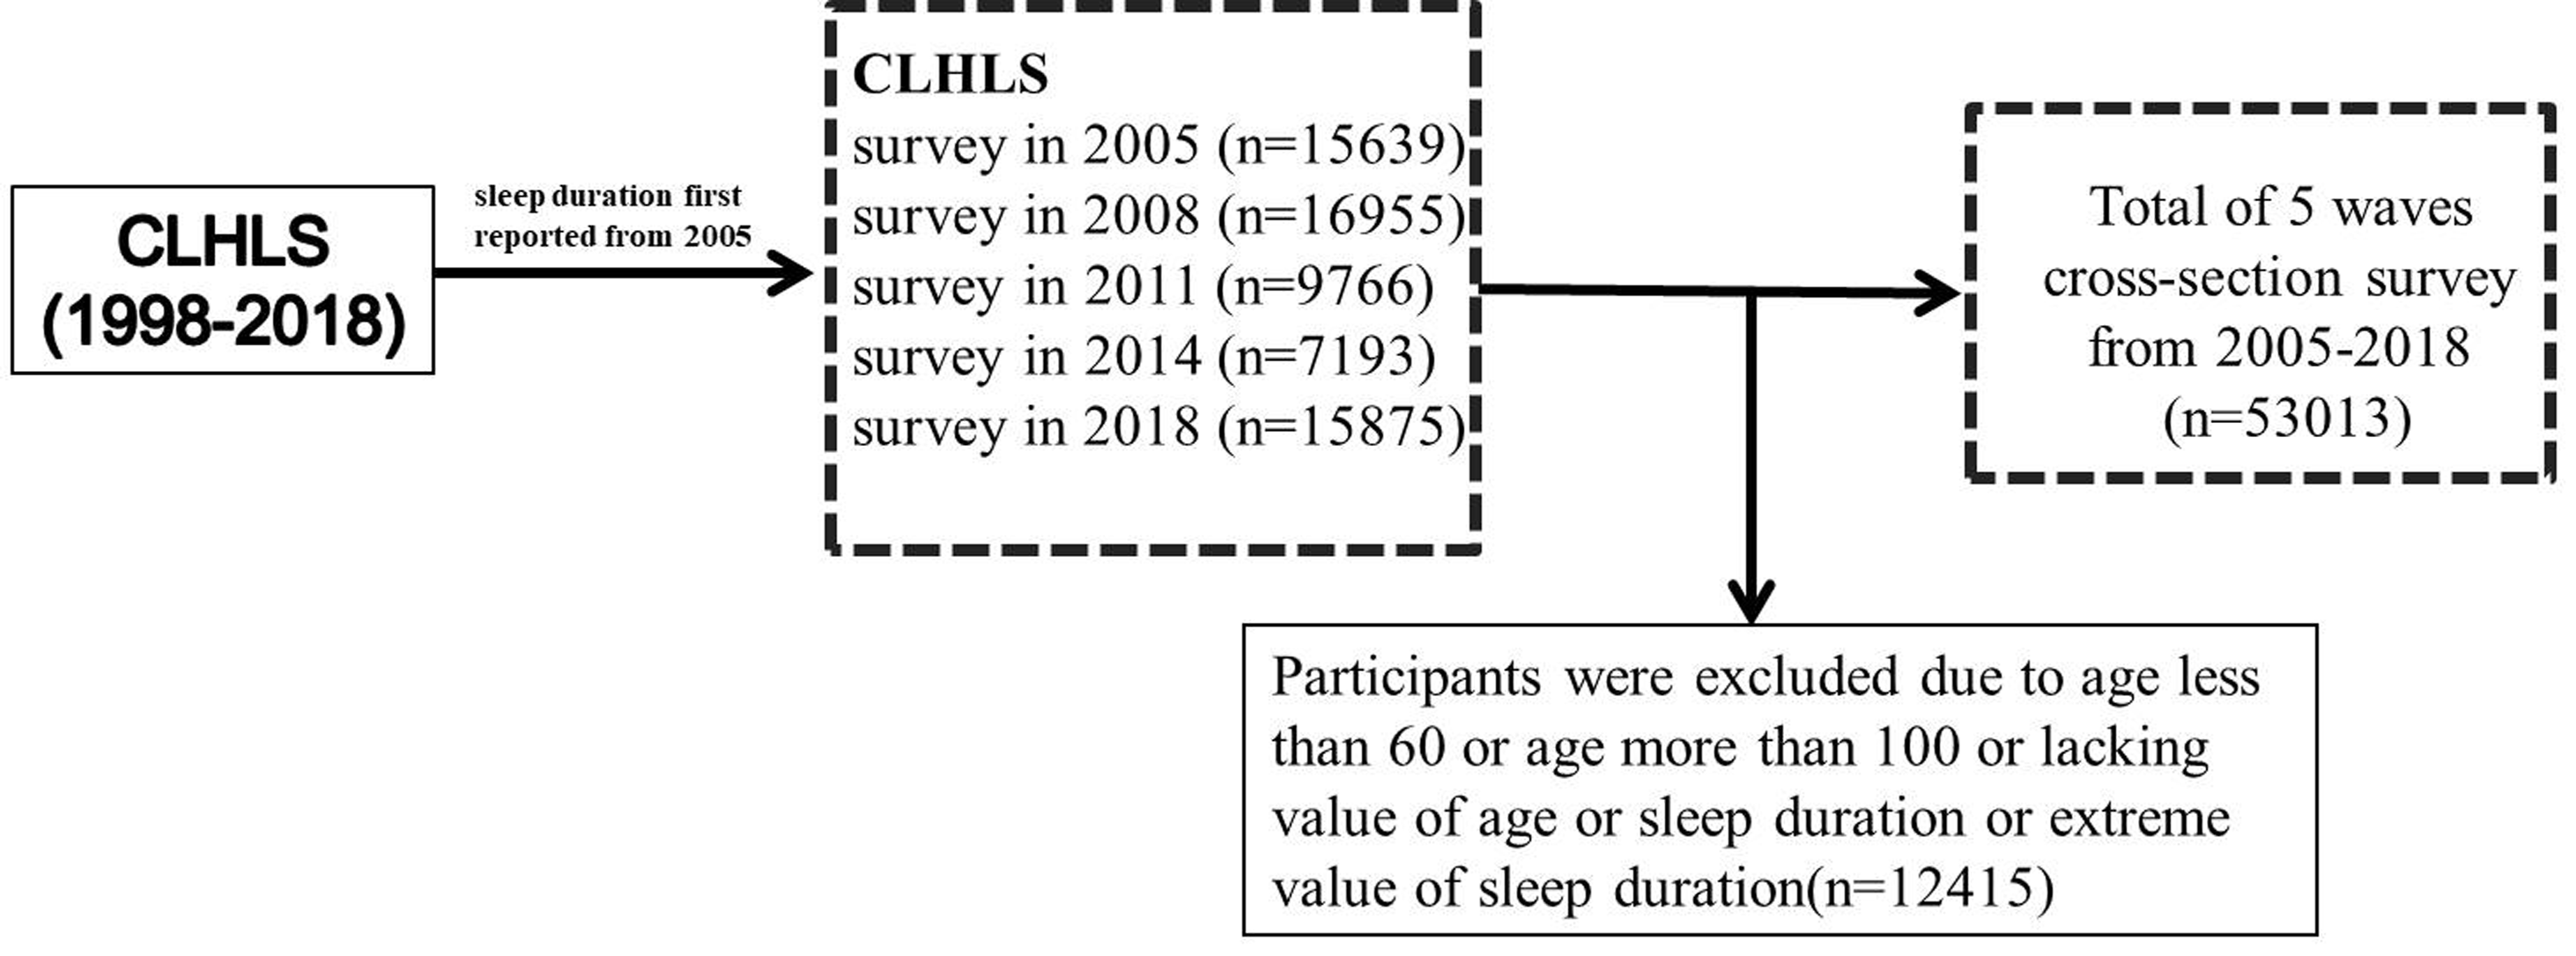
Supplementary figure 1.** The flowchart of the selection of the study sample.


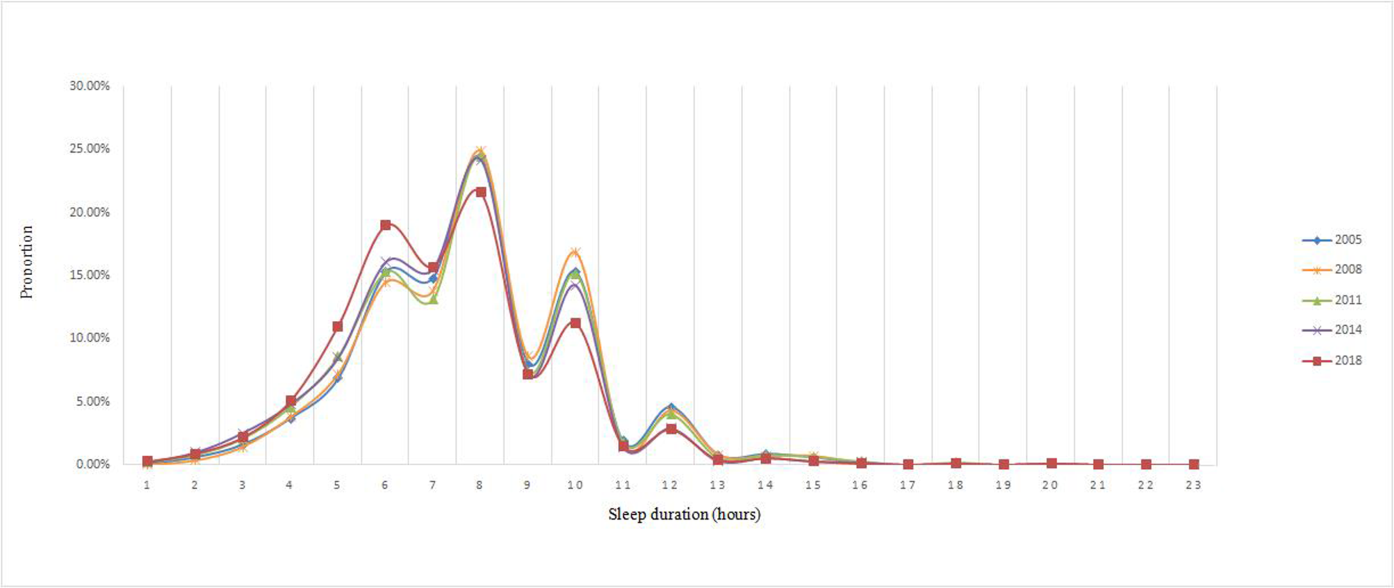


**

Supplementary figure 2.** Distribution of the proportion of sleep duration among Chinese elderly during 2005-2018.

**Supplementary figure 3.** Percentage of sleep quality by sleep duration among elderly men (A) and elderly women (B) in China during 2005-2018.

**Supplementary table 1.** Characteristics of Chinese elderly individuals in the CLHLS, 2005-2018

| Characteristics | 2005 | 2008 | 2011 | 2014 | 2018 | p-value |
| --- | --- | --- | --- | --- | --- | --- |
| Number of participants | 12812 | 13409 | 8217 | 6117 | 12458 | ＜0.001 |
| 60-64y | 105 | 277 | 120 | 111 | 127 |  |
| 65-69y | 1620 | 1402 | 650 | 220 | 1465 |  |
| 70-74y | 1611 | 1501 | 1217 | 922 | 1723 |  |
| 75-79y | 1640 | 1372 | 1210 | 1118 | 2004 |  |
| 80-84y | 1342 | 1971 | 1316 | 1051 | 2136 |  |
| 85-89y | 2557 | 2292 | 1305 | 1106 | 1732 |  |
| 90-94y | 2438 | 3020 | 1441 | 921 | 2032 |  |
| 95-99y | 1499 | 1574 | 958 | 668 | 1239 |  |
| Age, years | 82.6(82.4-82.7) | 83.2(83.0-83.4) | 82.7(82.5-82.9) | 82.8(82.6-83.0) | 81.5(81.3-81.7) | 0.207 |
| Smoking at present (%) | 12.7(12.1-13.2) | 19.2(18.5-19.9) | 17.9(17.0-18.7) | 17.4(16.4-18.4) | 14.4(13.8-15.0) | ＜0.001 |
| Drinking at present (%) | 14.7(14.1-15.2) | 14.7(14.1-15.3) | 14.4(13.6-15.1) | 14.8(13.9-15.7) | 14.5(13.1-15.2) | 0.944 |
| Middle education level or above (%) | 12.4(11.8-12.9) | 12.5(12.0-13.0) | 11.8(11.1-12.5) | 12.6(11.8-13.4) | 12.1(11.5-12.7) | 0.490 |
| Currently married(%) | 30.1(29.3-30.8) | 29.8(29.0-30.6) | 29.4(28.4-30.3) | 30.3(29.2-31.4) | 29.6(28.2-30.4) | 0.720 |
| Urbanization(%) | 37.6(36.7-38.4) | 36.9(36.1-37.7) | 39.8(38.7-40.9) | 37.3(36.1-38.5) | 35.4(34.6-36.2) | ＜0.001 |
| General obesity (%) | 30.7(29.9-31.5) | 31.8(31.0-32.6) | 32.2(31.2-33.2) | 31.3(30.1-32.5) | 30.9(30.1-31.7) | 0.101 |
| Abdominal obesity (%) | 34.5(33.6-35.3) | 35.1(34.3-35.9) | 35.0(34.0-36.0) | 36.1(34.9-37.3) | 36.2(35.4-37.0) | 0.036 |
| Hypertension (%) | 13.0(12.4-13.5) | 13.1(12.5-13.7) | 13.3(12.6-14.0) | 12.8(12.0-13.6) | 13.3(12.7-13.9) | 0.862 |
| Diabetes (%) | 8.50(8.00-9.00) | 7.90(7.40-8.40) | 9.90(9.30-10.5) | 11.5(10.7-12.3) | 12.7(12.1-13.3) | ＜0.001 |
| Heart diseases(%) | 6.30(5.80-6.80) | 6.60(6.20-7.00) | 7.10(6.50-7.70) | 6.40(5.80-7.00) | 6.40(5.90-6.90) | 0.194 |
| Stroke(%) | 3.20(2.90-3.50) | 3.10(2.90-3.30) | 3.00(2.60-3.40) | 3.00(2.60-3.40) | 2.80(2.50-3.10) | 0.436 |
| Bronchitis(%) | 2.20(2.00-2.40) | 2.50(2.20-2.70) | 2.30(2.00-2.60) | 2.40(2.00-2.80) | 2.50(2.30-2.70) | 0.473 |

Abbreviation: CLHLS, Chinese Longitudinal Healthy Longevity Survey

**Supplementary table 2.** Odds Ratio (95% confidence interval) of adjusted age-specific prevalence of short sleep duration (≤6 hours/day) and survey year in accordance with sex: CLHLS 2005-2018.

|  | 2005 | 2008 | 2011 | 2014 | 2018 | P for trend a |
| --- | --- | --- | --- | --- | --- | --- |
| Total |  |  |  |  |  |  |
| Crude OR | Reference | 0.961(0.910-1.014) | 1.175(1.106-1.249) | 1.262(1.181-1.347) | 1.598(1.515-1.684) | ＜0.001 |
| Adjusted ORb | Reference | 0.964(0.913-1.017) | 1.176(1.107-1.249) | 1.263(1.183-1.349) | 1.589(1.508-1.676) | ＜0.001 |
| Adjusted age-specific ORc |  |  |  |  |  |  |
| 60-64y | Reference | 0.389(0.166-0.911) | 0.375(0.139-1.011) | 0.406(0.148-1.113) | 0.906(0.360-2.282) | 0.009 |
| 65-69y | Reference | 0.977(0.850-1.169) | 1.133(0.928-1.383) | 0.866(0.626-1.199) | 1.601(1.379-1.860) | ＜0.001 |
| 70-74y | Reference | 0.992(0.851-1.157) | 1.086(0.926-1.273) | 1.162(0.997-1.382) | 1.445(1.252-1.669) | ＜0.001 |
| 75-79y | Reference | 0.919(0.786-1.074) | 1.087(0.927-1.274) | 1.186(1.011-1.391) | 1.465(1.277-1.681) | ＜0.001 |
| 80-84y | Reference | 0.968(0.8333-1.124) | 1.273(1.084-1.495) | 1.149(0.967-1.364) | 1.568(1.374-1.832) | ＜0.001 |
| 85-89y | Reference | 0.963(0.849-1.092) | 1.167(1.009-1.349) | 1.392(1.198-1.619) | 1.755(1.543-1.996) | ＜0.001 |
| 90-94y | Reference | 1.035(0.917-1.169) | 1.288(1.115-1.487) | 1.399(1.187-1.650) | 1.606(1.412-1.825) | ＜0.001 |
| 95-99y | Reference | 0.869(0.736-1.027) | 1.047(0.867-1.261) | 1.213(0.989-1.489) | 1.520(1.287-1.795) | ＜0.001 |
| Elderly men |  |  |  |  |  |  |
| Crude OR | Reference | 0.940(0.868-1.019) | 1.077(0.985-1.178) | 1.220(1.108-1.343) | 1.513(1.400-1.636) | ＜0.001 |
| Adjusted ORb | Reference | 0.941(0.868-1.019) | 1.077(0.984-1.178) | 1.220(1.108-1.343) | 1.512(1.398-1.634) | ＜0.001 |
| Adjusted age-specific ORd |  |  |  |  |  |  |
| 60-64y | Reference | 0.252(0.061-1.041) | 0.214(0.046-1.001) | 0.237(0.052-1.091) | 0.505(0.115-2.214) | 0.144 |
| 65-69y | Reference | 1.088(0.863-1.372) | 1.193(0.898-1.585) | 0.896(0.580-1.385) | 1.531(1.227-1.911) | 0.001 |
| 70-74y | Reference | 0.991(0.706-1.233) | 1.081(0.862-1.355) | 1.049(0.817-1.346) | 1.395(1.136-1.713) | 0.005 |
| 75-79y | Reference | 0.943(0.752-1.182) | 1.038(0.825-1.306) | 1.202(0.958-1.510) | 1.448(1.185-1.770) | ＜0.001 |
| 80-84y | Reference | 1.034(0.834-1.283) | 1.123(0.887-1.421) | 1.132(0.881-1.453) | 1.512(1.226-1.864) | ＜0.001 |
| 85-89y | Reference | 0.950(0.789-1.143) | 1.169(0.945-1.444) | 1.488(1.196-1.851) | 1.712(1.415-2.071) | ＜0.001 |
| 90-94y | Reference | 0.964(0.800-1.162) | 1.153(0.922-1.443) | 1.328(1.034-1.706) | 1.561(1.286-1.894) | ＜0.001 |
| 95-99y | Reference | 0.577(0.433-0.769) | 0.668(0.486-0.917) | 1.042(0.749-1.449) | 1.265(0.973-1.643) | ＜0.001 |
| Elderly women |  |  |  |  |  |  |
| Crude OR | Reference | 0.981(0.912-1.056) | 1.279(1.178-1.388) | 1.314(1.201-1.438) | 1.682(1.565-1.807) | ＜0.001 |
| Adjusted ORb | Reference | 0.990(0.920-1.066) | 1.286(1.184-1.396) | 1.322(1.208-1.447) | 1.662(1.547-1.786) | ＜0.001 |
| Adjusted age-specific ORd |  |  |  |  |  |  |
| 60-64y | Reference | 0.440(0.125-1.556) | 0.685(0.146-3.203) | 0.534(0.102-2.805) | 1.309(0.375-4.565) | 0.202 |
| 65-69y | Reference | 0.940(0.753-1.173) | 1.166(0.871-1.562) | 0.975(0.589-1.614) | 1.679(1.368-2.062) | ＜0.001 |
| 70-74y | Reference | 1.010(0.814-1.254) | 1.115(0.890-1.396) | 1.312(1.027-1.675) | 1.525(1.245-1.868) | ＜0.001 |
| 75-79y | Reference | 0.903(0.727-1.122) | 1.151(0.921-1.437) | 1.195(0.954-1.496) | 1.474(1.219-1.783) | ＜0.001 |
| 80-84y | Reference | 0.912(0.739-1.124) | 1.436(1.150-1.794) | 1.161(0.916-1.473) | 1.648(1.351-2.010) | ＜0.001 |
| 85-89y | Reference | 0.978(0.823-1.162) | 1.171(0.958-1.430) | 1.312(1.066-1.616) | 1.778(1.492-2.120) | ＜0.001 |
| 90-94y | Reference | 1.091(0.929-1.281) | 1.405(1.163-1.698) | 1.470(1.180-1.832) | 1.646(1.386-1.955) | ＜0.001 |
| 95-99y | Reference | 1.082(0.879-1.332) | 1.346(1.066-1.699) | 1.341(1.033-1.742) | 1.708(1.376-2.120) | ＜0.001 |

Abbreviation: CLHLS, Chinese Longitudinal Healthy Longevity Survey. p＜0.05

aTrends in the prevalence of obesity from 2005 to 2018 were assessed by linear-by-linear trend test.

b Adjusted ORs were adjusted by age, sex, smoking status, drinking status, education level, marital status, urbanization and some diseases that are common to the elderly based on 2005 samples.

cAdjusted ORs were adjusted by the same sociodemographic characteristics as above except for age.

dAdjusted ORs were adjusted by the same sociodemographic characteristics as above except for sex.

**Supplementary table 3.** Age-standardized and age-specific prevalence of short sleep duration (≤5 hours/day) striated by sex in Chinese elderly population: CLHLS 2005-2018.

|  | 2005 | 2008 | 2011 | 2014 | 2018 | P for trend |
| --- | --- | --- | --- | --- | --- | --- |
| Total |  |  |  |  |  |  |
| Crude prevalence (%) | 12.9(12.3-13.5) | 12.8(12.2-13.4) | 16.2(15.4-17.0) | 17.0(16.1-17.9) | 19.4(18.7-20.1) | ＜0.001 |
| Age-standardized prevalence (%) a | 11.4(11.3-11.5) | 11.2(11.1-11.3) | 11.9(11.9-12.0) | 12.7(12.6-12.8) | 15.7(15.7-15.8) | ＜0.001 |
| Age-specific prevalence (%) |  |  |  |  |  |  |
| 60-64y | 8.00(-2.60-18.6) | 9.00(5.60-12.4) | 5.70(0.30-11.1) | 9.80(2.3-17.3) | 10.4(3.06-17.2) | 0.690 |
| 65-69y | 11.4(9.90-12.9) | 10.0(8.40-11.6) | 12.2(9.70-14.7) | 9.10(5.3-12.9) | 16.2(14.3-18.1) | ＜0.001 |
| 70-74y | 13.8(12.1-15.5) | 12.5(10.8-14.2) | 15.7(13.7-17.7) | 15.0(12.7-17.3) | 17.7(15.9-19.5) | ＜0.001 |
| 75-79y | 14.0(12.3-15.7) | 14.3(12.4-16.2) | 15.9(13.8-18.0) | 18.2(16.0-20.4) | 20.3(18.5-22.1) | ＜0.001 |
| 80-84y | 14.8(12.9-16.7) | 14.9(13.3-16.5) | 19.5(17.4-21.6) | 17.1(14.8-19.4) | 22.3(20.5-24.1) | ＜0.001 |
| 85-89y | 14.0(12.7-15.3) | 13.1(11.7-14.5) | 17.4(15.3-19.5) | 20.8(18.4-23.2) | 22.0(20.0-24.0) | ＜0.001 |
| 90-94y | 11.3(10.0-12.6) | 13.3(12.1-14.5) | 16.7(14.8-18.6) | 16.3(13.9-18.7) | 18.4(16.7-20.1) | ＜0.001 |
| 95-99y | 11.1(9.50-12.7) | 10.7(9.20-12.2) | 13.6(11.4-15.8) | 15.3(12.6-18.0) | 18.3(16.1-20.5) | ＜0.001 |
| Elderly men |  |  |  |  |  |  |
| Crude prevalence (%) | 11.7(10.9-12.5) | 11.0(10.2-11.8) | 13.0(12.0-14.0) | 13.9(12.7-15.1) | 16.4(15.5-17.3) | ＜0.001 |
| Age-standardized prevalence (%) a | 7.30(7.20-7.40) | 9.70(9.70-9.80) | 10.1(10.0-10.1) | 9.50(9.40-9.50) | 12.6(12.5-12.7) | ＜0.001 |
| Age-specific prevalence (%) |  |  |  |  |  |  |
| 60-64y | 0 | 7.60(3.60-11.6) | 5.70(-0.50-11.9) | 6.50(-0.60-13.6) | 7.70(-0.70-16.1) | 0.912 |
| 65-69y | 9.30(7.30-11.3) | 9.10(7.00-11.2) | 10.2(7.10-13.3) | 6.30(2.30-10.3) | 14.0(11.5-16.5) | 0.002 |
| 70-74y | 12.1(9.90-14.3) | 10.5(8.40-12.6) | 13.4(10.9-15.9) | 12.5(9.60-15.4) | 13.9(11.7-16.1) | 0.106 |
| 75-79y | 11.6(9.40-13.8) | 13.0(10.5-15.5) | 12.1(9.60-14.6) | 14.6(11.8-17.4) | 16.7(14.4-19.0) | 0.001 |
| 80-84y | 13.1(10.5-15.7) | 13.8(11.7-15.9) | 16.6(13.8-19.4) | 13.7(10.7-16.7) | 18.2(15.8-20.6) | 0.003 |
| 85-89y | 12.9(11.0-14.8) | 11.5(9.60-13.4) | 14.5(11.8-17.2) | 18.0(14.8-21.2) | 18.7(16.0-21.4) | ＜0.001 |
| 90-94y | 11.1(9.20-13.0) | 10.3(8.70-11.9) | 13.3(10.7-15.9) | 14.2(10.9-17.5) | 16.8(14.4-19.2) | ＜0.001 |
| 95-99y | 11.6(8.90-14.3) | 8.40(6.10-10.7) | 8.90(6.00-11.8) | 12.2(8.20-16.2) | 16.8(13.6-20.0) | 0.001 |
| Elderly women |  |  |  |  |  |  |
| Crude prevalence (%) | 13.9(13.1-14.7) | 14.5(13.7-15.3) | 19.2(18.0-20.4) | 20.0(18.6-21.4) | 22.3(21.3-23.3) | ＜0.001 |
| Age-standardized prevalence (%) a | 14.2(14.2-14.3) | 13.0(13.0-13.1) | 14.2(14.2-14.3) | 18.8(18.7-18.9) | 19.1(19.0-19.2) | ＜0.001 |
| Age-specific prevalence (%) |  |  |  |  |  |  |
| 60-64y | 12.5(-3.70-28.7) | 11.3(5.30-17.3) | 5.90(-5.30-17.1) | 20.0(-0.20-40.2) | 13.2(2.40-24.0) | 0.664 |
| 65-69y | 13.6(11.3-15.9) | 11.0(8.60-13.4) | 14.8(10.6-19.0) | 14.1(6.40-21.8) | 18.4(15.6-21.2) | 0.001 |
| 70-74y | 15.6(13.1-18.1) | 14.8(12.2-17.4) | 18.4(15.2-21.6) | 17.9(14.3-21.5) | 22.1(19.2-25.0) | ＜0.001 |
| 75-79y | 16.4(13.9-18.9) | 15.6(12.8-18.4) | 20.1(16.8-23.4) | 22.4(18.9-25.9) | 23.8(21.2-26.4) | ＜0.001 |
| 80-84y | 16.5(13.7-19.3) | 16.1(13.8-18.4) | 22.5(19.3-25.7) | 20.5(17.1-23.9) | 26.1(23.5-28.7) | ＜0.001 |
| 85-89y | 15.1(13.2-17.0) | 14.7(12.7-16.7) | 20.2(17.1-23.3) | 23.5(20.0-27.0) | 24.9(22.1-27.7) | ＜0.001 |
| 90-94y | 11.5(9.80-13.2) | 15.7(14.0-17.4) | 19.4(16.7-22.1) | 18.0(14.6-21.4) | 19.8(17.4-22.2) | ＜0.001 |
| 95-99y | 10.7(8.70-12.7) | 12.0(10.0-14.0) | 16.6(13.6-19.6) | 17.2(13.5-20.9) | 19.5(16.6-22.4) | ＜0.001 |

Abbreviation: CLHLS, Chinese Longitudinal Healthy Longevity Survey.

a Adjusted by the direct method to the year 2010 Census population using the age groups 60-64years, 65-69years, 70-74years, 75-79 years, 80-84 years, 85-89 years, 90-94 years and 95-99years.

**Supplementary table 4**. Odds Ratio (95% confidence interval) of adjusted age-specific prevalence of short sleep duration (≤5 hours/day) and survey year in accordance with sex: CLHLS 2005-2018.

|  | 2005 | 2008 | 2011 | 2014 | 2018 | P |
| --- | --- | --- | --- | --- | --- | --- |
| Total |  |  |  |  |  |  |
| Crude OR | Reference | 0.994(0.925-1.069) | 1.307(1.209-1.413) | 1.386(1.274-1.508) | 1.636(1.528-1.751) | ＜0.001 |
| Adjusted ORb | Reference | 0.993(0.923-1.067) | 1.307(1.208-1.413) | 1.385(1.273-1.507) | 1.641(1.532-1.756) | ＜0.001 |
| Adjusted age-specific ORc |  |  |  |  |  |  |
| 60-64y | Reference | 1.132(0.237-5.401) | 0.692(0.113-4.218) | 1.247(0.226-6.878) | 1.330(0.261-6.762) | 0.885 |
| 65-69y | Reference | 0.858(0.681-1.080) | 1.062(0.800-1.409) | 0.769(0.473-1.249) | 1.493(1.218-1.830) | ＜0.001 |
| 70-74y | Reference | 0.894(0.727-1.101) | 1.164(0.947-1.431) | 1.092(0.869-1.374) | 1.347(1.117-1.624) | 0.001 |
| 75-79y | Reference | 1.027(0.836-1.262) | 1.163(0.945-1.433) | 1.375(1.121-1.686) | 1.571(1.316-1.875) | ＜0.001 |
| 80-84y | Reference | 1.007(0.829-1.224) | 1.393(1.137-1.707) | 1.187(0.953-1.479) | 1.647(1.373-1.975) | ＜0.001 |
| 85-89y | Reference | 0.929(0.787-1.095) | 1.291(1.077-1.548) | 1.609(1.339-1.932) | 1.727(1.472-2.025) | ＜0.001 |
| 90-94y | Reference | 1.206(1.024-1.420) | 1.570(1.302-1.893) | 1.523(1.228-1.888) | 1.768(1.494-2.092) | ＜0.001 |
| 95-99y | Reference | 0.967(0.771-1.213) | 1.258(0.984-1.608) | 1.450(1.112-1.890) | 1.796(1.447-2.229) | ＜0.001 |
| Elderly men |  |  |  |  |  |  |
| Crude OR | Reference | 0.935(0.837-1.044) | 1.134(1.006-1.279) | 1.224(1.026-1.392) | 1.484(1.338-1.647) | ＜0.001 |
| Adjusted ORb | Reference | 0.934(0.836-1.043) | 1.136(1.007-1.281) | 1.224(1.076-1.392) | 1.492(1.344-1.655) | ＜0.001 |
| Adjusted age-specific ORd |  |  |  |  |  |  |
| 60-64y | Reference | - | - | - | - | - |
| 65-69y | Reference | 0.968(0.687-1.364) | 1.089(0.720-1.646) | 0.650(0.318-1.331) | 1.585(1.162-2.162) | 0.004 |
| 70-74y | Reference | 0.861(0.634-1.169) | 1.131(0.836-1.531) | 1.047(0.747-1.469) | 1.174(0.888-1.554) | 0.285 |
| 75-79y | Reference | 1.143(0.842-1.552) | 1.050(0.763-1.445) | 1.308(0.961-1.779) | 1.531(1.167-2.009) | 0.014 |
| 80-84y | Reference | 1.058(0.794-1.410) | 1.307(0.964-1.773) | 1.051(0.751-1.471) | 1.476(1.122-1.942) | 0.013 |
| 85-89y | Reference | 0.882(0.690-1.129) | 1.150(0.874-1.513) | 1.482(1.126-1.950) | 1.555(1.221-1.981) | ＜0.001 |
| 90-94y | Reference | 0.919(0.710-1.190) | 1.223(0.908-1.647) | 1.323(0.949-1.844) | 1.605(1.244-2.070) | ＜0.001 |
| 95-99y | Reference | 0.703(0.474-1.041) | 0.742(0.471-1.153) | 1.064(0.677-1.671) | 1.533(1.086-2.164) | ＜0.001 |
| Elderly women |  |  |  |  |  |  |
| Crude OR | Reference | 1.045(0.949-1.150) | 1.470(1.326-1.631) | 1.547(1.382-1.730) | 1.769(1.616-1.937) | ＜0.001 |
| Adjusted ORb | Reference | 1.046(0.951-1.152) | 1.472(1.327-1.632) | 1.548(1.384-1.732) | 1.765(1.612-1.933) | ＜0.001 |
| Adjusted age-specific ORd |  |  |  |  |  |  |
| 60-64y | Reference | 0.813(0.145-4.555) | 0.407(0.032-5.237) | 1.583(0.201-12.468) | 1.036(0.178-6.036) | 0.816 |
| 65-69y | Reference | 0.788(0.575-1.078) | 1.104(0.746-1.635) | 1.044(0.534-2.038) | 1.429(1.090-1.873) | 0.003 |
| 70-74y | Reference | 0.940(0.708-1.248) | 1.223(0.920-1.624) | 1.151(0.841-1.576) | 1.536(1.193-1.979) | 0.002 |
| 75-79y | Reference | 0.945(0.715-1.251) | 1.281(0.972-1.689) | 1.471(1.119-1.935) | 1.593(1.259-2.015) | ＜0.001 |
| 80-84y | Reference | 0.970(0.743-1.266) | 1.468(1.116-1.931) | 1.300(0.970-1.743) | 1.779(1.394-2.270) | ＜0.001 |
| 85-89y | Reference | 0.970(0.777-1.212) | 1.423(1.116-1.815) | 1.721(1.345-2.202) | 1.854(1.499-2.293) | ＜0.001 |
| 90-94y | Reference | 1.442(1.165-1.784) | 1.857(1.457-2.366) | 1.697(1.278-2.253) | 1.912(1.527-2.392) | ＜0.001 |
| 95-99y | Reference | 1.137(0.859-1.505) | 1.640(1.215-2.215) | 1.731(1.244-2.408) | 1.999(1.514-2.640) | ＜0.001 |

Abbreviation: CLHLS, Chinese Longitudinal Healthy Longevity Survey.

aTrends in the prevalence of obesity from 2005 to 2018 were assessed by linear-by-linear trend test.

b Adjusted ORs were adjusted by age, sex, smoking status, drinking status, education level, marital status, urbanization and some diseases that are common to the elderly based on 2005 samples.

cAdjusted ORs were adjusted by the same sociodemographic characteristics as above except for age.

dAdjusted ORs were adjusted by the same sociodemographic characteristics as above except for sex.

**Supplementary table 5**. Odds Ratio (95% confidence interval) of adjusted age-specific prevalence of long sleep duration (≥9 hours/day) and survey year in accordance with sex: CLHLS 2005-2018.

|  | 2005 | 2008 | 2011 | 2014 | 2018 | P |
| --- | --- | --- | --- | --- | --- | --- |
| Total |  |  |  |  |  |  |
| Crude OR | Reference | 1.064(1.010-1.120) | 0.928(0.874-0.985) | 0.775(0.724-0.829) | 0.660(0.625-0.697) | ＜0.001 |
| Adjusted OR b | Reference | 1.041(0.988-1.097) | 0.926(0.871-0.983) | 0.769(0.718-0.823) | 0.682(0.645-0.721) | ＜0.001 |
| Adjusted age-specific OR c |  |  |  |  |  |  |
| 60-64y | Reference | 0.993(0.364-2.710) | 0.657(0.209-2.060) | 1.226(0.408-3.688) | 0.317(0.095-1.059) | 0.052 |
| 65-69y | Reference | 0.907(0.765-1.076) | 0.765(0.608-0.963) | 0.891(0.633-1.256) | 0.648(0.543-0.773) | ＜0.001 |
| 70-74y | Reference | 1.133(0.961-1.335) | 0.968(0.812-1.155) | 0.812(0.665-0.993) | 0.748(0.632-0.886) | ＜0.001 |
| 75-79y | Reference | 1.093(0.929-1.287) | 1.011(0.852-1.199) | 0.858(0.719-1.024) | 0.740(0.633-0.865) | ＜0.001 |
| 80-84y | Reference | 1.032(0.888-1.200) | 0.832(0.702-0.985) | 0.836(0.698-1.000) | 0.670(0.574-0.782) | ＜0.001 |
| 85-89y | Reference | 1.059(0.942-1.190) | 0.923(0.802-1.062) | 0.696(0.597-0.812) | 0.637(0.557-0.728) | ＜0.001 |
| 90-94y | Reference | 1.005(0.901-1.120) | 0.911(0.797-1.040) | 0.730(0.623-0.855) | 0.692(0.612-0.783) | ＜0.001 |
| 95-99y | Reference | 1.067(0.926-1.230) | 1.165(0.990-1.370) | 0.805(0.668-0.969) | 0.717(0.614-0.837) | ＜0.001 |
| Elderly men |  |  |  |  |  |  |
| Crude OR | Reference | 1.097(1.019-1.181) | 0.936(0.860-1.019) | 0.836(0.761-0.919) | 0.684(0.632-0.740) | ＜0.001 |
| Adjusted OR b | Reference | 1.089(1.010-1.173) | 0.944(0.866-1.029) | 0.837(0.761-0.921) | 0.700(0.646-0.758) | ＜0.001 |
| Adjusted age-specific OR d |  |  |  |  |  |  |
| 60-64y | Reference | 2.559(0.300-21.79) | 1.398(0.149-13.15) | 4.630(0.523-41.00) | 1.167(0.119-11.49) | 0.047 |
| 65-69y | Reference | 1.010(0.803-1.271) | 0.813(0.604-1.094) | 0.939(0.618-1.428) | 0.659(0.516-0.841) | 0.005 |
| 70-74y | Reference | 1.093(0.877-1.362) | 0.941(0.744-1.189) | 0.939(0.726-1.216) | 0.773(0.618-0.966) | 0.041 |
| 75-79y | Reference | 1.094(0.874-1.369) | 1.017(0.806-1.283) | 0.829(0.651-1.055) | 0.725(0.583-0.901) | 0.002 |
| 80-84y | Reference | 1.134(0.920-1.399) | 0.848(0.669-1.076) | 0.974(0.759-1.249) | 0.701(0.564-0.872) | ＜0.001 |
| 85-89y | Reference | 1.034(0.876-1.220) | 0.888(0.729-1.082) | 0.731(0.590-0.907) | 0.613(0.505-0.743) | ＜0.001 |
| 90-94y | Reference | 1.055(0.897-1.240) | 0.948(0.777-1.158) | 0.711(0.563-0.899) | 0.708(0.591-0.848) | ＜0.001 |
| 95-99y | Reference | 1.263(0.999-1.597) | 1.404(1.079-1.827) | 0.973(0.723-1.309) | 0.834(0.655-1.062) | 0.001 |
| Elderly women |  |  |  |  |  |  |
| Crude OR | Reference | 1.016(0.940-1.098) | 0.943(0.861-1.032) | 0.709(0.638-0.789) | 0.594(0.545-0.641) | ＜0.001 |
| Adjusted OR b | Reference | 0.967(0.893-1.047) | 0.928(0.846-1.018) | 0.695(0.624-0.775) | 0.628(0.575-0.686) | ＜0.001 |
| Adjusted age-specific OR d |  |  |  |  |  |  |
| 60-64y | Reference | 0.343(0.068-1.740) | 0.429(0.055-3.329) | - | 0.216(0.032-1.472) | 0.609 |
| 65-69y | Reference | 0.710(0.508-0.991) | 0.755(0.480-1.189) | 0.912(0.441-1.886) | 0.602(0.431-0.841) | 0.041 |
| 70-74y | Reference | 0.991(0.739-1.330) | 0.739(0.531-1.028) | 0.556(0.372-0.830) | 0.531(0.384-0.735) | ＜0.001 |
| 75-79y | Reference | 1.099(0.832-1.451) | 1.053(0.785-1.412) | 0.946(0.698-1.281) | 0.762(0.584-0.994) | 0.076 |
| 80-84y | Reference | 0.875(0.686-1.116) | 0.863(0.661-1.126) | 0.692(0.515-0.930) | 0.599(0.467-0.769) | ＜0.001 |
| 85-89y | Reference | 1.099(0.921-1.311) | 1.016(0.823-1.255) | 0.657(0.517-0.837) | 0.582(0.472-0.717) | ＜0.001 |
| 90-94y | Reference | 0.943(0.811-1.098) | 0.877(0.728-1.057) | 0.688(0.547-0.864) | 0.657(0.550-0.784) | ＜0.001 |
| 95-99y | Reference | 0.961(0.799-1.155) | 1.105(0.894-1.366) | 0.731(0.570-0.938) | 0.653(0.529-0.806) | ＜0.001 |

Abbreviation: CLHLS, Chinese Longitudinal Healthy Longevity Survey. p＜0.05

aTrends in the prevalence of obesity from 2005 to 2018 were assessed by linear-by-linear trend test.

b Adjusted ORs were adjusted by age, sex, smoking status, drinking status, education level, marital status, urbanization and some diseases that are common to the elderly based on 2005 samples.

cAdjusted ORs were adjusted by the same sociodemographic characteristics as above except for age.

dAdjusted ORs were adjusted by the same sociodemographic characteristics as above except for sex.
